1 **Title:** Phylogenomic study of *Staphylococcus aureus* and *Staphylococcus haemolyticus* clinical  
2 isolates from Egypt

3 **Authors:** Cesar Montelongo<sup>a</sup>, Carine R. Mores<sup>a</sup>, Catherine Putonti<sup>a,b,c</sup>, Alan J. Wolfe<sup>a</sup>, Alaa  
4 Abouelfetouh<sup>d,e\*</sup>

5  
6 **Affiliations:**

7 <sup>a</sup>Department of Microbiology and Immunology, Stritch School of Medicine, Loyola University  
8 Chicago, Maywood, IL 60153 USA

9 <sup>b</sup>Bioinformatics Program, Loyola University Chicago, Chicago, IL 60660 USA

10 <sup>c</sup>Department of Biology, Loyola University Chicago, Chicago, IL 60660 USA

11 <sup>d</sup>Department of Microbiology and Immunology, Faculty of Pharmacy, Alexandria University,  
12 Alexandria, Egypt

13 <sup>e</sup>Department of Microbiology and Immunology, Faculty of Pharmacy, Alalamein International  
14 University, Alamein, Egypt

15 **Author email addresses:**

16 Cesar Montelongo:

17 [cmontelongoherna@luc.edu](mailto:cmontelongoherna@luc.edu)

18 Carine R. Mores:

19 [carinermores@gmail.com](mailto:carinermores@gmail.com)

20 Catherine Putonti:

21 [cputonti@luc.edu](mailto:cputonti@luc.edu)

22 Alan J. Wolfe:

23 [Awolfe@luc.edu](mailto:Awolfe@luc.edu)

24 Alaa Abouelfetouh:

25 Alaa.abouelfetouh@pharmacy.alexu.edu.eg

26 [aabouelfetouh@Aiu.edu.eg](mailto:aabouelfetouh@Aiu.edu.eg)

27

28 **Corresponding Author:** Alaa Abouelfetouh; Alaa.abouelfetouh@pharmacy.alexu.edu.eg

29

30 **Keywords:** *Staphylococcus aureus*; *Staphylococcus haemolyticus*; Middle East; MLST

31

32 **Repositories:** Raw sequencing reads and assembled genomes can be found at BioProject

33 Accession number PRJNA648411 (<https://www.ncbi.nlm.nih.gov/bioproject/PRJNA648411>).

34

35 **Abstract**

36 Antibiotic resistant *Staphylococcus* infections are a global concern, with increasing cases of  
37 resistant *Staphylococcus aureus* and *Staphylococcus haemolyticus* found circulating in the  
38 Middle East. While extensive surveys have described the prevalence of resistant infections in  
39 Europe, Asia, and North America, the population structure of resistant staphylococcal Middle  
40 Eastern clinical isolates is poorly characterized. We performed whole genome sequencing of 56  
41 *S. aureus* and 10 *S. haemolyticus* isolates from Alexandria Main University Hospital.  
42 Supplemented with additional publicly available genomes from the region (34 *S. aureus* and 6 *S.*  
43 *haemolyticus*), we present the largest genomic study of staphylococcal Middle Eastern isolates.  
44 These genomes include 20 *S. aureus* multilocus sequence typing (MLST) types and 9 *S.*  
45 *haemolyticus* MLSTs, including 3 and 1 new MLSTs, respectively. Phylogenomic analyses of  
46 each species core genome largely mirrored MLSTs, irrespective of geographical origin. The  
47 hospital-acquired *spa* t037/SCC*mec* III/MLST CC8 clone represented the largest clade,  
48 comprising 22% of *S. aureus* isolates. Similar to other regional genome surveys of *S. aureus*, the  
49 Middle Eastern isolates have an open pangenome, a strong indicator of gene exchange of  
50 virulence factors and antibiotic resistance genes with other reservoirs. We recommend stricter  
51 implementation of antibiotic stewardship and infection control plans in the region.

## 52 **Impact Statement**

53 Staphylococci are under-studied despite their prevalence within the Middle East. Methicillin-  
54 resistant *Staphylococcus aureus* (MRSA) is endemic to hospitals in this region, as are other  
55 antibiotic-resistant strains of *S. aureus* and *S. haemolyticus*. To provide insight into the strains  
56 currently in circulation within Egypt, we performed whole genome sequencing of 56 *S. aureus*  
57 and 10 *S. haemolyticus* isolates from Alexandria Main University Hospital (AMUH). Through  
58 analysis of these genomes, as well as other genomes of isolates from the Middle East, we were  
59 able to produce a more complete picture of the current diversity than traditional molecular typing  
60 strategies. Furthermore, the *S. haemolyticus* genome analyses provide the first insight into strains  
61 found in Egypt. Our analysis of resistance and virulence mechanisms carried by these strains  
62 provides invaluable insight into future plans of antibiotic stewardship and infection control  
63 within the region.

64

## 65 **Data Summary**

66 Raw sequencing reads and assembled genomes can be found at BioProject Accession number  
67 PRJNA648411 (<https://www.ncbi.nlm.nih.gov/bioproject/PRJNA648411>).

## 68 **Introduction**

69 Staphylococci are a heterogenous group of commensal bacteria in humans with the  
70 potential to cause infections <sup>1</sup>. Two staphylococcal species especially relevant to the clinical  
71 setting are *Staphylococcus aureus* and *Staphylococcus haemolyticus*. *S. aureus* is arguably the  
72 most clinically important staphylococcal species; the infections it can cause range from mild  
73 erythema to serious life-threatening ailments, including septicemia, pneumonia, and endocarditis  
74 <sup>2</sup>. A difficulty in treating and controlling *S. aureus* stems from its prevalence and increasing  
75 resistance to clinically used antibiotics, resulting in it being one of the leading agents for  
76 nosocomial and community-acquired infections <sup>3,4</sup>. *S. haemolyticus* is the second most common  
77 staphylococcal species isolated in human blood cultures and a prominent reservoir for antibiotic  
78 resistance genes, which can be shared with other Staphylococci, including *S. aureus* <sup>5-7</sup>.

79 Epidemiological surveillance and profiling are key to managing Staphylococci <sup>8,9</sup>.  
80 Historically, profiling of Staphylococci has relied on complementary molecular typing strategies,  
81 such as Multi Locus Sequence Typing (MLST), typing of hypervariable short repeats in Protein  
82 A (*spa*), subtyping elements in the cassette chromosome *mec* (*SCCmec*), and presence of the  
83 Panton-Valentine leucocidin (PVL) <sup>10</sup>. MLST consists of comparing the sequence of specific  
84 housekeeping genes in bacteria; the strategy is effective at tracking a broad range of clones over  
85 a global area, but prior to whole-genome sequencing (WGS) this method was slow and  
86 expensive <sup>10</sup>. *spa* typing complements MLST by tracking the molecular evolution of *S. aureus*,  
87 given the relevance of Protein A to the infectious process <sup>9</sup>. *SCCmec* permits profiling of  
88 clinically relevant antibiotic resistances, including *mecA*, which results in methicillin-resistant *S.*  
89 *aureus* (MRSA) <sup>11,12</sup>. PVL is an important cytotoxin in MRSA that is common in community-  
90 acquired MRSA (CA-MRSA), but uncommon in hospital-associated MRSA (HA-MRSA) <sup>11</sup>.  
91 Traditionally, these profiling strategies have been a powerful means to type, trace, and manage

92 Staphylococcal infections, but technical limitations curtail the usefulness of molecular typing in  
93 real time <sup>9,10</sup>.

94 The increasing utility, speed, and inexpensiveness of WGS in the clinical setting is poised  
95 to immensely benefit Staphylococci profiling <sup>10,13-15</sup>. WGS allows access to the entire  
96 staphylococcal genome, including sequence data for typing MLST, *spa*, *SCCmec*, and PVL. In  
97 addition, WGS allows us to study the phylogenomic lineage, core, and accessory genome of  
98 isolates from an infectious outbreak or a geographical area. A key question is how WGS analysis  
99 compares to traditional typing techniques. For example, there is evidence that phylogenomic data  
100 does not always agree with standard typing methods; skepticism also exists that WGS can  
101 reliably detect single nucleotide polymorphisms (SNPs) in sensitive genetic content <sup>10</sup>. In  
102 contrast, studies have demonstrated that WGS can be used to type, discriminate, and cluster  
103 staphylococcal isolates for the purpose of outbreak control <sup>13-15</sup>. WGS could be used to close the  
104 gap in staphylococcal management in regions that have not been extensively monitored, such as  
105 the Middle East and specifically Egypt.

106 The epidemiology of Staphylococci in non-European countries of the Mediterranean  
107 region is under-studied <sup>16</sup>. Antibiotic resistance in *S. haemolyticus* has been identified in Middle  
108 Eastern countries, such as Turkey <sup>6</sup> and Egypt <sup>7</sup>. There is evidence that MRSA is prevalent and  
109 endemic to hospitals in this region, with a median MRSA prevalence of 38% in Algeria, Cyprus,  
110 Egypt, Jordan, Lebanon, Malta, Morocco, Tunisia and Turkey <sup>17</sup>. Broadly speaking, PVL  
111 prevalence is reported as low in some of these countries, indicating a predominance of HA-  
112 MRSA <sup>16,18,19</sup>. Research into the lineage of Staphylococci in this region is urgent, as it would  
113 give us both a present and future assessment of staphylococcal epidemiology.

114 Generally, molecular typing and phylogeny data are limited from this region. Multiple  
115 isolates in Palestine were typed as ST22 with a minority typed as ST80-MRSA-IV and PVL-  
116 positive <sup>20</sup>. In Jordan, genotyping of *S. aureus* isolates revealed that the majority were ST80-  
117 MRSA-IV <sup>21</sup>. In Lebanon, the primary lineage was PVL-positive ST80-MRSA-IV followed by  
118 PVL-positive ST30-MSSA <sup>17</sup>. In Algeria, it was reported that ST80-MRSA-IV was present in  
119 most neonates tested over an 18-month period, with a minority of these PVL-positive <sup>22</sup>. Finally,  
120 for Egypt, it has been reported that the prevalent MLSTs are ST30, ST80, and a novel type,  
121 ST1010; PVL prevalence has been estimated at 19% <sup>23</sup>. Enany *et al.* reported that the Egyptian  
122 ST80 lineage was different from the globally prevalent ST80, primarily due to a unique *spa* type  
123 and antimicrobial resistance <sup>23</sup>.

124 Egypt presents a unique case-study for staphylococcal distribution in Arab countries <sup>24</sup>.  
125 Egypt's cultural and geographical placement may facilitate local Staphylococcal exposure to  
126 international lineages, both from the Middle East and elsewhere . The accessibility of WGS  
127 presents an opportunity to profile Staphylococci in Egypt and the rest of the Arab region in terms  
128 of gene marker typing, core genome, and phylogenomics. Prior to this study, there were limited  
129 genomic data of *S. aureus* and *S. haemolyticus* in this region.

130 Here, we report the phylogenetic and phylogenomic associations of 56 *S. aureus* and 10  
131 *S. haemolyticus* isolates from Egypt and their relationship to 34 *S. aureus* and 6 *S. haemolyticus*  
132 isolates from Egypt, Kuwait, Lebanon, Tunisia, Palestine, United Arab Emirates, Morocco, and  
133 Sudan. WGS afforded insight into the lineage and genetic content of these two staphylococcal  
134 species, including type information historically obtained using molecular methods. Both the  
135 MLST and SCC*mec* type mirrored the core genome, indicating that WGS is a fast and accessible  
136 option for Staphylococcal profiling. We identified multiple MLST and clonal complexes in

137 circulation in the region, including 3 new genotypes. Genome analysis indicated that *S. aureus* in  
138 Egypt has an open pangenome that includes virulence genes in both the core and accessory  
139 genomes. Surveillance and profiling of Staphylococci are key to infection control, and we have  
140 shown that WGS can be a valuable asset, especially in regions where Staphylococci have not  
141 been well studied, such as the Middle East.

142

## 143 **Results**

144 *S. aureus* and *S. haemolyticus* isolates were collected from patients presenting to the Medical  
145 Microbiology Laboratory at AMUH between September and December 2015. Draft genomes for  
146 66 of the clinical isolates were of high quality and were included in our analysis. These genomes  
147 included 56 *S. aureus* and 10 *S. haemolyticus* isolates, assembled on average into 71 and 126  
148 contigs, respectively. Additional publicly available *S. aureus* and *S. haemolyticus* strains were  
149 identified and included in subsequent analyses: 34 *S. aureus* (from Egypt n=17; Kuwait n=5;  
150 Lebanon n=4; Tunisia, Palestine and United Arab Emirates n=2 each; Morocco and Sudan n=1  
151 each) and 6 *S. haemolyticus* (all from Egypt). **Supplementary Table S1** lists the available  
152 metadata and presents the genome assembly statistics for *S. aureus* and *S. haemolyticus*. The *S.*  
153 *aureus* genomes were, on average, larger than *S. haemolyticus* genomes: 2.8 Mbp and 2.5 Mbp,  
154 respectively. Genome size and GC content were on par with other publicly available genomes.  
155 Each draft genome was annotated using NCBI's PGAP, identifying an average of 2,839 and  
156 2,495 coding sequences (CDS) for *S. aureus* and *S. haemolyticus*, respectively. The strains varied  
157 in their number of rRNA operons and tRNAs.

158

## 159 ***Strain genotyping***



160 The genomes represent varied MLSTs. The 16 *S. haemolyticus* isolates examined here belonged  
161 to nine MLSTs, including a new genotype ST-74 (strain 51) assigned as a result of this study,  
162 and an isolate of unknown ST (strain 7A). ST-3 was the most common amongst the isolates  
163 examined (n=4) (**Supplementary Table S2**). A total of 20 *S. aureus* MLSTs were identified,  
164 including three novel types ST-5860 (strain 48), ST-5861 (strain 2705404), and ST-5862 (strain  
165 2705410); all three of these strains came from prior studies and were isolated from Egypt,  
166 Kuwait and Lebanon, respectively (**Supplementary Table S2**). Twelve different MLSTs were  
167 identified among the Egyptian isolates; ST-239 was the most prevalent (n=24), followed by ST-1  
168 (n=19) and then ST-80 (n=12). Two of the AMUH *S. aureus* isolates, strains AA32 and AA35,  
169 could not be typed due to incomplete sequences.

170 *S. aureus* isolates could be categorized into seven clonal complexes (CC)  
171 (**Supplementary Table S2**), the largest being CC8 (n=26), consisting mainly of Egyptian  
172 isolates and one Moroccan isolate (strain 12480433). 12 strains were identified as ST-80, which  
173 does not belong to a clonal complex. 20 different *spa* types were identified in addition to 7  
174 isolates that could not be typed. The predominant *spa* type was t037 (n=33), with all but one  
175 belonging to CC8; 30 of these 33 isolates belonged to SCCmec III. The next most frequent *spa*  
176 type was t127 (n=19), all belonging to CC1. **Table 1** summarizes these results.

177

### 178 *Core and pangenomes of S. haemolyticus and S. aureus strains*

179 To investigate the core genome and pangenome of *S. haemolyticus*, we added the 6 publicly  
180 available *S. haemolyticus* genomes from Egypt to our 10 *S. haemolyticus* genomes  
181 (**Supplementary Table S1**). The pangenome for these strains included 3,541 genes  
182 (**Supplementary Fig. S1**), with 1,834 single copy number genes in the core genome. Included

183 within these core genes are the virulence factors autolysin (*atl*), elastin binding protein (*ebp*),  
184 thermonuclease (*nuc*), and cytolysin (*cytR2*).

185 In addition to our 56 *S. aureus* genomes, our core and pangenome analysis included 34 *S.*  
186 *aureus* draft genome assemblies from the Arab region (**Supplementary Table S1**). The  
187 pangenome of these 90 isolates contained 4,283 genes (**Fig. 1, panel A**), the core genome  
188 included 1,501 single copy number genes, and the accessory genome contained 2,178 genes.  
189 These analyses show that the Arab isolates have an open pangenome. The functionality of the  
190 genes within the *S. aureus* core genome was determined according to their COG categories (**Fig.**  
191 **1, panel B**). The core genome was further examined for virulence factors, finding the same gene  
192 related to autolysin (*atl*) that was found in the *S. haemolyticus* core. We also identified genes  
193 associated with intercellular adhesin, cysteine protease, thermonuclease, capsule, and the Type  
194 VII secretion system (**Table 2**).

195  
196 In addition to the virulence factors found within the core genome, we identified virulence  
197 factors and antibiotic resistance genes within the accessory genome (**Supplementary Tables S3**  
198 **and S4**). The isolates were screened for the presence of *lukF/S-PV*, which encodes PVL.  
199 Isolates positive for PVL were mainly (77%) *mecA* positive, present in CC1, ST-80, CC30 and  
200 CC8, and obtained from Egypt, Kuwait, Tunisia, Lebanon and Morocco. Importantly, isolates  
201 obtained from CA infections belonged to CC1, ST-80, CC5, CC97 and CC8, making PVL  
202 presence a good predictor for the ability of the isolate to cause CA infections.

203

204

205 *Phylogenomic study of S. haemolyticus and S. aureus strains from the Arab region*

206 The core genes were used to derive phylogenies for each species. The *S. haemolyticus* isolates  
207 were all from Egypt and clustered into two clades (**Fig. 2**). As the tree shows, variation between  
208 the core genomes of these isolates was minor. Furthermore, the clade structure of the genomes  
209 corresponded with MLST, indicated in the bar of **Fig. 2**. The MLST tree for these genomes is  
210 shown in **Supplementary Fig. S2**.

211  
212 *S. aureus* isolates came from all over the region, and clustered into six clades, with Egyptian  
213 isolates represented in all clades (**Fig. 3 and 4**). Clade 1 isolates belonged to ST-1 and were from  
214 Egypt and the UAE, clade 2 contained the majority of the Arab isolates including some from  
215 Egypt. The predominating clone seen among 46.7% of the isolates within clade 2 was *spa*  
216 t044/*SCCmec* IV/ST-80, which shows some degree of shared content between these isolates.  
217 Clade 3 isolates were solely from Egypt and belonged mainly to ST-15 and ST-5. Clade 4  
218 comprised isolates from Egypt, Sudan and Palestine, with the majority belonging to ST-22 and  
219 ST-361. Clade 5 contained isolates from Egypt, belonging mainly to ST-97. The remaining  
220 isolates were in clade 6, of ST-239 and from Egypt, with the exception of one Moroccan isolate.  
221 This clade represents a *spa* t037/*SCCmec* III/MLST CC8 clone. The phylogenetic tree derived  
222 from the core genome sequences corresponded with the tree derived from the MLST marker  
223 genes (**Fig. 3 and Supplementary Fig. S2**). 14 isolates lacked *mecA* (**Fig. 4**, pale green star) and  
224 occurred predominantly in CC1 (n=5), CC15 (n=3) and CC30, CC8 and ST-80, with one isolate  
225 in each; in addition, three isolates belonged to ST-361 (n=2) or ST-5860 (n=1). 13 of these *mecA*  
226 negative isolates were from Egypt.

227

228

229

## 230 **Discussion**

231 *S. aureus* is a major human pathogen in hospital and community settings, with the  
232 infection rate of MRSA increasing on a global scale at varying rates <sup>25,26</sup>. While extensive  
233 surveys have provided insight into the prevalence of such resistant infections in Europe <sup>27</sup>, Asia  
234 <sup>28,29</sup>, and North America <sup>30,31</sup>, limited data is available for the Arab region <sup>32</sup>. Furthermore,  
235 antibiotic resistant *S. haemolyticus* strains have been identified worldwide <sup>5</sup>, including Turkey <sup>6</sup>  
236 and Egypt <sup>7</sup>. Prior to the study initiated here, there were limited genomic data for these two  
237 *Staphylococcus* species from the Middle East. The addition of 56 *S. aureus* and 10 *S.*  
238 *haemolyticus* genomes enabled our investigation of strain diversity within the region. With the  
239 majority (or all, in the case of *S. haemolyticus*) of genomes representing isolates from Egypt, we  
240 could investigate members of these species currently in circulation. We found that several  
241 different MLSTs and clonal complexes are in circulation within Egypt and more broadly within  
242 the region. 20 *S. aureus* MLSTs were identified in the region, including 3 new genotypes  
243 identified here, and 12 of these are in circulation within Egypt. Analysis of the *S. haemolyticus*  
244 genomes found 9 MLSTs in circulation within Egypt, including one new genotype.

245 The core genome for the *S. aureus* strains is slightly larger than that previously calculated  
246 for the species <sup>33,34</sup>. This is expected, however, as our analysis is restricted to fewer genomes  
247 from a single region. Both our *S. haemolyticus* and *S. aureus* core genomes include the gene *atl*,  
248 which is essential for biofilm formation <sup>35</sup>. Furthermore, the *ica* gene cluster, also associated  
249 with biofilm formation <sup>36</sup>, as well as its regulator *icaR* <sup>37</sup>, are included in the core genome of the  
250 *S. aureus* strains examined here. The presence of *atl* and the *ica* gene clusters signifies the  
251 biofilm potential of the isolates. This potential is relevant because 80% of human microbial

252 infections are complicated by biofilm formation, such as in wounds, IV catheters, sutures and  
253 implants (see reviews <sup>38,39</sup>). Moreover, the biofilm capacity to evade the host's immune defenses,  
254 the inability of most antibiotic treatment regimens to eradicate existing biofilms and the fact that  
255 biofilms serve as a good medium for exchange of genetic material (e.g. plasmids) between cells  
256 make biofilm formation a major health concern in the clinical setting (<sup>40</sup>; see reviews <sup>41,42</sup>).

257 The Arab *S. aureus* genomes have an open pangenome, evidence of gene exchange  
258 between these isolates and other reservoirs. *S. aureus* is naturally competent <sup>43</sup>, and horizontal  
259 gene transfer (HGT) between strains, coagulase-negative *Staphylococcus* (CoNS) strains, and  
260 other species is well documented (see review <sup>44</sup>). Recently, HGT was shown to be a driver of  
261 persistent *S. aureus* infections within patients <sup>45</sup>. Genes within the accessory genome included  
262 virulence factors and antibiotic resistance genes (**Supplementary Tables S3 and S4**). Prior  
263 comparative genomic studies for this species similarly found an open pangenome and resistance  
264 genes within the accessory genome <sup>33</sup>.

265 Phylogenomic analyses of the core genome largely mirrored MLST types (**Fig. 3**). This  
266 was irrespective of geographical origin. Interestingly, strains of the same SCCmec type had a  
267 more similar core genome sequence (**Fig. 4**). In a prior phylogenetic study, John and co-workers  
268 found that 16S rRNA gene sequence similarity did not correspond with SCCmec type, leading  
269 them to conclude that horizontal gene transfer plays a role in resistance gene acquisition <sup>33</sup>.  
270 However, only two SCCmec types were identified for the samples examined here. Recently,  
271 Soliman *et al.* published a study characterizing the genomes of 18 MRSA isolates from a tertiary  
272 care hospital in Cairo, Egypt; their isolates were primarily SCCmec types V (n=9) and VI (n=2),  
273 not observed within our larger collection <sup>46</sup>. Similarly, SCCmec type V and IV have been most  
274 frequently observed in other *S. aureus* studies within the region <sup>47-49</sup>. Rather, our study found

275 that SCC*mec* type III and IV were equally prevalent within the region. SCC*mec* type III  
276 predominated among HA-MRSA infections, suggesting that, in contrast to these prior studies,  
277 our isolates indicate that HA-infections have a higher incidence among the patients tested here.  
278 AMUH, where our isolates were collected, is the largest tertiary hospital and main referral center  
279 in the Northern sector of Egypt; thus, patients with more severe infections would be more likely  
280 to be treated at AMUH than at any other hospital in the region. Prior studies have found SCC*mec*  
281 type III to be the predominant type in Asian countries <sup>28</sup>. Besides, the SCC*mec* type III/MLST  
282 ST-239 is the oldest pandemic strain of MRSA <sup>50</sup>, which might explain its prevalence among the  
283 current collection of isolates.

284       The *S. haemolyticus* and *S. aureus* genomes examined here provide insight into the  
285 diversity of strains currently in circulation in Egypt, particularly with respect to their encoded  
286 virulence factors and antibiotic resistance genes. WGS analysis enabled a more complete picture  
287 of this diversity than molecular typing strategies. The *S. haemolyticus* genomes provide the first  
288 insight into strains found in Egypt. Identifying the main genotypes, as well as the resistance and  
289 virulence mechanisms among the resistant isolates in the region, can drive antibiotic stewardship  
290 and infection control plans.

291

## 292 **Methods**

### 293 Bacterial isolates

294 A total of 89 *S. aureus* and 14 *S. haemolyticus* consecutive non-duplicate isolates were collected  
295 from the Medical Microbiology Laboratory at Alexandria Main University Hospital (AMUH)  
296 between September and December 2015. These isolates were obtained from various clinical  
297 specimens, including pus, blood, sputum, urine, tissue, aspirate and broncho-alveolar lavage

298 (BAL). The identity of the isolates was determined using conventional methods, such as Gram  
299 staining, growth on and fermentation of mannitol salt agar, growth on DNase agar and slide  
300 coagulase testing using Dryspot Staphytest Plus (Oxoid Ltd, England), and confirmed using  
301 Matrix Assisted Laser Desorption Ionization - Time of Flight Mass Spectrometry (MALDI-TOF  
302 MS) (Bruker Daltonik, USA). The isolates were further classified as either hospital-acquired or  
303 community-acquired infections based on a 48 h window between the dates of patient admission  
304 and isolate collection <sup>51</sup>.

305

#### 306 DNA extraction

307 Colonies grown on tryptone soya agar (TSA) plates were harvested and washed in 1 ml  
308 phosphate buffer saline (PBS) and resuspended in 0.5 ml SET (75mM NaCl, 25mM EDTA,  
309 20mM Tris, pH 7.5), to which 50ul of fresh 20 mg/ml lysozyme in PBS and 30ul Mutanolysin  
310 were added; the mixture was incubated at 37°C for 60 min. The cells were then treated with 60ul  
311 10% sodium dodecyl sulphate and 20ul proteinase K and incubated at 55°C for two hours with  
312 gentle inversion. The suspension was mixed gently with 210ul of 6M NaCl, and 700ul  
313 phenol:chloroform were added, followed by incubation at room temperature for 30-60 minutes,  
314 using a rotating wheel for gentle mixing. The suspension was then centrifuged at maximum  
315 speed for 10 min and the aqueous phase was transferred to a new microfuge tube and mixed  
316 gently with an equal volume of isopropanol. The tubes were centrifuged to produce a DNA pellet  
317 that was washed with 70% ethanol, which was left to evaporate overnight. The pellets were  
318 resuspended in 50ul ddH<sub>2</sub>O and stored at -20°C till further processing.

319

#### 320 Genome Sequencing and Genome Assembly

321 The Illumina Nextera kit was used for whole genome library preparation. Each isolate was  
322 sequenced using the Illumina MiSeq System, producing paired-end 2x250 bp reads. Quality  
323 control and de-multiplexing of sequence data was done with onboard MiSeq Control software  
324 and MiSeq Reporter v3.1. Raw reads were trimmed using Sickle v1.33  
325 (<https://github.com/najoshi/sickle>) and assembled using SPAdes v3.13.0<sup>52</sup> with the “only-  
326 assembler” option for k=55, 77, 99, and 127. Genome coverage was calculated using BMAP  
327 v38.47 (<https://sourceforge.net/projects/bbmap/>). Contigs shorter than 500 bp were pruned using  
328 bioawk (<https://github.com/lh3/bioawk>). Genome assemblies were annotated using PATRIC  
329 v3.3.18<sup>53</sup>. Genomes were deposited in NCBI’s Assembly database, along with raw sequence  
330 data in SRA under BioProject PRJNA648411. Deposited genomes were annotated using the  
331 NCBI Prokaryotic Genome Annotation Pipeline (PGAP) v5.0<sup>54</sup>. Unless previously noted,  
332 default parameters were used for each software tool. To complement our analysis of the genomes  
333 from AMUH, raw sequence data for 41 *S. aureus* and 10 *S. haemolyticus* strains were retrieved  
334 from NCBI. These records were identified by searching SRA (as of January 2020) for strains  
335 isolated in the Arab region. These raw reads were processed as indicated above. High-quality  
336 assemblies were included in subsequent analyses.

337

### 338 Bioinformatic Analysis

339 Multilocus sequence typing (MLST) was determined using the MLST v2.0.4 web server  
340 available through the Center for Genomic Epidemiology<sup>55</sup>. MLST allele sequence and profile  
341 data were obtained from PubMLST v2.0.0<sup>56</sup>. *spa* typing was performed using the online tool  
342 SpaTyper v1.0 available through the Center for Genomic Epidemiology<sup>57</sup>. SCCmec typing was  
343 performed using SCCmecFinder v1.2 online tool available through the Center for Genomic



344 Epidemiology (<https://cge.cbs.dtu.dk/services/SCCmecFinder/>)<sup>58,59</sup>. Resistance and virulence  
345 genes were identified using PATRIC v3.6.5<sup>60</sup> and VFAnalyzer<sup>61</sup>.

346

### 347 Phylogenomic and Phylogenetic Analysis

348 The core and pangenomes were generated using anvi'o v5.1. The following scripts were used to  
349 calculate the pangenome: anvi-gen-genomes-storage, anvi-pan-genome and anvi-display-pan,  
350 and the following script was used to calculate the core genome: anvi-get-sequences-for-gene-  
351 clusters<sup>62,63</sup>. Functional groups for the core genome were determined by querying core genome  
352 amino acid sequences against the COG database<sup>64</sup> through anvi'o. The core genes were  
353 concatenated for each genome and then aligned using MAFFT v7.388<sup>65</sup>. The tree was built  
354 using the FastTree v2<sup>66</sup> plugin in Geneious Prime v2019.2 (Biomatters Ltd., Auckland, New  
355 Zealand). MLST ST sequences were downloaded from PubMLST v2.0.0<sup>56</sup>, aligned in Geneious  
356 Prime v2019.2 and the trees were built using the FastTree v2<sup>66</sup> plugin in Geneious Prime  
357 v2019.2. iTOL v5.6.1<sup>67</sup> was used to annotate and visualize all trees.

358

359

### 360 **Author Statements**

361

### 362 Acknowledgments

363 We acknowledge Roberto Limeira and Loyola Genomics Facility for performing the whole  
364 genome sequencing of the isolates. We also acknowledge funding from NIH (R01 DK104718  
365 awarded to AJW), NSF (1661357 awarded to CP), USAID (GSP-T85 awarded to AA) and DFG  
366 (ZI 665/3-1 awarded to AA). The funders did not play a part in the design or conduct of the study

367 Authors and Contributors

368 CM: Formal Analysis; Writing – Original Draft Preparation; Writing – Review and Editing

369 CRM: Formal Analysis; Writing – Original Draft Preparation; Writing – Review and Editing

370 CP: Formal Analysis; Writing – Original Draft Preparation; Visualization; Writing – Review and  
371 Editing

372 AJW: Formal Analysis; Conceptualisation; Writing – Review and Editing

373 AA: Conceptualisation; Formal Analysis; Writing – Original Draft Preparation; Writing –  
374 Review and Editing

375 All authors reviewed the manuscript.

376 Competing Interests

377 AJW is a member of the Advisory Board of Urobiome Therapeutics. The remaining authors  
378 report no disclosures.

379 Data availability

380 Raw sequencing reads and assembled genomes can be found at BioProject Accession number  
381 PRJNA648411 (<https://www.ncbi.nlm.nih.gov/bioproject/PRJNA648411>)

382 Ethics declarations:

383 Ethics approval and consent to participate

384 Not applicable

385

386 Consent for publication

387 Not applicable

388

389 Figure legends

390 **Figure 1.** Genome analysis of 90 Arab *S. aureus* strains. **(a)** The pangenome. Each ring  
391 corresponds to a single genome. Each radial extension in the ring corresponds to the presence  
392 (black) or absence (light gray) of a given gene cluster (homologous gene). The bar charts list the  
393 number of genes identified in the given genome (top) and the number of singleton genes or genes  
394 that are unique to the given genome (bottom). The pangenome of these 90 isolates contained  
395 4,283 genes, the core genome included 1,501 single copy number genes, and the accessory  
396 genome contained 2,178 genes. **(b)** Functionality of genes contained within the core genome.  
397 The same autolysin gene (*atl*) found in the core genome of *S. haemolyticus* was found in *S.*  
398 *aureus*.

399

400 **Figure 2.** Phylogeny based upon the core genes for the *S. haemolyticus* isolates. All *S.*  
401 *haemolyticus* isolates were from Egypt and clustered into two clades corresponding with MLST.

402

403 **Figure 3.** *S. aureus* core genome phylogeny colored by geographical origin of isolation (strain  
404 name color) and MLST (right bar). *S. aureus* isolates were from different parts of the region, and  
405 clustered into six clades, each containing Egyptian isolates. Clade 1 isolates belonged to ST-1  
406 and were from Egypt and the UAE, clade 2 contained the majority of the Arab isolates, with *spa*  
407 t044/SCC*mec* IV/ST-80 as the predominating clone. Clade 3 isolates were solely from Egypt and  
408 belonged mainly to ST-15 and ST-5. Clade 4 comprised isolates from Egypt, Sudan and  
409 Palestine, with the majority belonging to ST-22 and ST-361. Clade 5 contained isolates from  
410 Egypt and belonged mainly to ST-97. The remaining isolates were in clade 6, of ST-239 and  
411 from Egypt and Morocco (n=1). This clade represents a *spa* t037/SCC*mec* III/MLST CC8 clone.

412

413 **Figure 4.** Phylogenetic tree based on core genome annotated by geographic origin, MLST CC,  
 414 main *spa* and SCC*mec* types. 14 isolates, mostly from Egypt, lacked *mecA* and occurred  
 415 predominantly in CC1 (n=5), CC15 (n=3) and CC30, CC8 and ST-80 (one isolate in each), ST-  
 416 361 (n=2) or ST-5860 (n=1).

417

418

419 **Table 1:** MLST clonal complexes, *spa* types, and SCC*mec* types among the *S. aureus* isolates.

| MLST CC | Strain Name                                   | Geographical Origin | <i>spa</i> type | SCC <i>mec</i> type |
|---------|-----------------------------------------------|---------------------|-----------------|---------------------|
| CC1     | 3 (A), 3 (B), 23, 6 (B), 43, AA51, AA67, AA77 | Egypt               | t127            | N/D                 |
|         | R181, R180, AA1, AA78                         | UAE, Egypt          | t127            | N/D                 |
|         | 6 (A), AA69                                   | Egypt               | t127            | N/D                 |
|         | AA59, AA65, AA68                              | Egypt               | t127            | predicted as MSSA   |
|         | AA103, AA87                                   | Egypt               | t127            | predicted as MSSA   |
| CC15    | 15, 16                                        | Egypt               | t094            | predicted as MSSA   |
|         | 17                                            | Egypt               | unk             | predicted as MSSA   |
| CC22    | 41                                            | Egypt               | t13828          | IV                  |
|         | Gaza_MRSA_B62                                 | Palestine           | t223            | IV                  |
|         | AA18                                          | Egypt               | t223            | IV                  |
|         | AA5                                           | Egypt               | t3243           | IV                  |
|         | Gaza_MRSA_B04                                 | Palestine           | t790            | IV                  |
|         | 40                                            | Egypt               | unk             | IV                  |
| CC30    | AA41                                          | Egypt               | t037            | predicted as MSSA   |
|         | 19                                            | Egypt               | t1504           | N/D                 |

|              |                                                                                                                       |          |      |                   |
|--------------|-----------------------------------------------------------------------------------------------------------------------|----------|------|-------------------|
| <b>CC5</b>   | AA30                                                                                                                  | Egypt    | t304 | IV                |
|              | 14, AA76, AA80                                                                                                        | Egypt    | t688 | N/D               |
|              | AA70                                                                                                                  | Egypt    | t688 | VI(4B)            |
| <b>CC8</b>   | 12480433                                                                                                              | Morocco  | t008 | IV                |
|              | LHI_Sa_30                                                                                                             | Egypt    | t008 | N/D               |
|              | 46                                                                                                                    | Egypt    | t030 | III               |
|              | 50, AA101, AA13, AA14, AA22, AA23, AA27, AA31, AA33, AA46, AA52, AA55, AA57, AA60, AA61, AA62, AA63, AA64, AA91, AA92 | Egypt    | t037 | III               |
|              | AA79                                                                                                                  | Egypt    | t037 | N/D               |
|              | AA93                                                                                                                  | Egypt    | t037 | predicted as MSSA |
|              | AA29                                                                                                                  | Egypt    | unk  | III               |
| <b>CC97</b>  | AA36                                                                                                                  | Egypt    | t267 | N/D               |
|              | AA39, AA6                                                                                                             | Egypt    | t267 | IV                |
|              | AA104                                                                                                                 | Egypt    | t267 | N/D               |
|              | AA8                                                                                                                   | Egypt    | unk  | IV                |
| <b>ST-80</b> | 2705432, 2705403, 2705405, 2705407, 2705409, 2705412                                                                  | Tunisia, | t044 | IV                |
|              |                                                                                                                       | Kuwait,  |      |                   |
|              |                                                                                                                       | Lebanon  |      |                   |
|              | AA45                                                                                                                  | Egypt    | t044 | IV                |
|              | 2705431                                                                                                               | Tunisia  | t044 | predicted as MSSA |
|              | 2705411                                                                                                               | Lebanon  | t131 | IV                |
|              | AA2                                                                                                                   | Egypt    | t416 | IV                |
| AA3, AA4     | Egypt                                                                                                                 | t416     | N/D  |                   |

420

421 **Table 2.** Virulence factors included in the *S. aureus* core genome.

| <b>VFclass</b>   | <b>Virulence factors</b>  | <b>Related genes</b> |
|------------------|---------------------------|----------------------|
| Adherence        | Autolysin                 | <i>atl</i>           |
|                  | Intercellular adhesin     | <i>icaA</i>          |
|                  |                           | <i>icaD</i>          |
|                  |                           | <i>icaR</i>          |
| Enzyme           | Cysteine protease         | <i>sspC</i>          |
|                  | Thermonuclease            | <i>nuc</i>           |
| Immune evasion   | Capsule                   | <i>cap5A</i>         |
|                  |                           | <i>cap8B</i>         |
|                  |                           | <i>cap5M</i>         |
|                  |                           | <i>cap8N</i>         |
|                  |                           | <i>capO</i>          |
| Secretion system | Type VII secretion system | <i>esaB</i>          |
|                  |                           | <i>essA</i>          |
|                  |                           | <i>essB</i>          |
|                  |                           | <i>esxA</i>          |

422

423

424 **References**

- 425 1. Becker, K., Heilmann, C. & Peters, G. Coagulase-negative staphylococci. *Clinical*  
426 *Microbiology Reviews* **27**, 870–926 (2014).
- 427 2. Tong, S. Y. C., Davis, J. S., Eichenberger, E., Holland, T. L. & Fowler, V. G.  
428 *Staphylococcus aureus* infections: Epidemiology, pathophysiology, clinical manifestations,  
429 and management. *Clinical Microbiology Reviews* **28**, 603–661 (2015).
- 430 3. Stefani, S. *et al.* Meticillin-resistant *Staphylococcus aureus* (MRSA): Global epidemiology  
431 and harmonisation of typing methods. *International Journal of Antimicrobial Agents* vol. 39  
432 273–282 (2012).
- 433 4. Chambers, H. F. & DeLeo, F. R. Waves of resistance: *Staphylococcus aureus* in the  
434 antibiotic era. *Nature Reviews Microbiology* vol. 7 629–641 (2009).
- 435 5. Froggatt, J. W., Johnston, J. L., Galetto, D. W. & Archer, G. L. Antimicrobial resistance in  
436 nosocomial isolates of *Staphylococcus haemolyticus*. *Antimicrobial Agents and*  
437 *Chemotherapy* **33**, 460–466 (1989).
- 438 6. Morrissey, I., Leakey, A. & Northwood, J. B. In vitro activity of ceftaroline and comparator  
439 antimicrobials against European and Middle East isolates from complicated skin and skin-  
440 structure infections collected in 2008-2009. *International Journal of Antimicrobial Agents*  
441 **40**, 227–234 (2012).
- 442 7. Maarouf, L., Omar, H., El-Nakeeb, M. & Abouelfetouh, A. Prevalence and mechanisms of  
443 linezolid resistance among staphylococcal clinical isolates from Egypt. *European Journal of*  
444 *Clinical Microbiology and Infectious Diseases* (2020) doi:10.1007/s10096-020-04045-w.

- 445 8. Steinig, E. J. *et al.* Evolution and global transmission of a multidrug-resistant, community-  
446 associated methicillin-resistant staphylococcus aureus lineage from the Indian subcontinent.  
447 *mBio* **10**, (2019).
- 448 9. Pobiega, M., Wójkowska-Mach, J. & Heczko, P. B. Typing of Staphylococcus aureus in  
449 order to determine the spread of drug resistant strains inside and outside hospital  
450 environment. *Przegląd epidemiologiczny* **67**, 435-438,539-542 (2013).
- 451 10. Lindsay, J. A. Evolution of Staphylococcus aureus and MRSA during outbreaks. *Infection,*  
452 *Genetics and Evolution* **21**, 548–553 (2014).
- 453 11. Funaki, T. *et al.* SCCmec typing of PVL-positive community-acquired Staphylococcus  
454 aureus (CA-MRSA) at a Japanese hospital. *Heliyon* **5**, e01415 (2019).
- 455 12. Sabri, I., Adwan, K., Essawi, T. A. & Farraj, M. A. Molecular characterization of  
456 methicillin-resistant Staphylococcus aureus isolates in three different Arab world countries .  
457 *European Journal of Microbiology and Immunology* **3**, 183–187 (2013).
- 458 13. Harris, S. R. *et al.* Whole-genome sequencing for analysis of an outbreak of methicillin-  
459 resistant Staphylococcus aureus: A descriptive study. *The Lancet Infectious Diseases* **13**,  
460 130–136 (2013).
- 461 14. Eyre, D. W. *et al.* A pilot study of rapid benchtop sequencing of Staphylococcus aureus and  
462 Clostridium difficile for outbreak detection and surveillance. *BMJ Open* **2**, e001124 (2012).
- 463 15. Köser, C. U. *et al.* Rapid Whole-Genome Sequencing for Investigation of a Neonatal MRSA  
464 Outbreak. *New England Journal of Medicine* **366**, 2267–2275 (2012).
- 465 16. Tokajian, S. New epidemiology of Staphylococcus aureus infections in the Middle East.  
466 *Clinical Microbiology and Infection* vol. 20 624–628 (2014).



- 467 17. Borg, M. A. *et al.* Prevalence of methicillin-resistant *Staphylococcus aureus* (MRSA) in  
468 invasive isolates from southern and eastern Mediterranean countries on behalf of the ARMed  
469 Project members and collaborators. doi:10.1093/jac/dkm365.
- 470 18. Bhatta, D. R. *et al.* Association of Panton Valentine Leukocidin (PVL) genes with  
471 methicillin resistant *Staphylococcus aureus* (MRSA) in Western Nepal: A matter of concern  
472 for community infections (a hospital based prospective study). *BMC Infectious Diseases* **16**,  
473 (2016).
- 474 19. Falagas, M. E., Karageorgopoulos, D. E., Leptidis, J. & Korbila, I. P. MRSA in Africa:  
475 Filling the Global Map of Antimicrobial Resistance. *PLoS ONE* **8**, (2013).
- 476 20. Biber, A. *et al.* A typical hospital-acquired methicillin-resistant *staphylococcus aureus* clone  
477 is widespread in the community in the Gaza strip. *PLoS ONE* **7**, (2012).
- 478 21. Khalil, W., Hashwa, F., Shihabi, A. & Tokajian, S. Methicillin-resistant *Staphylococcus*  
479 *aureus* ST80-IV clone in children from Jordan. *Diagnostic Microbiology and Infectious*  
480 *Disease* **73**, 228–230 (2012).
- 481 22. Djoudi, F. *et al.* Panton-Valentine leukocidin positive sequence type 80 methicillin-resistant  
482 *Staphylococcus aureus* carrying a staphylococcal cassette chromosome *mec* type IVc is  
483 dominant in neonates and children in an Algiers hospital. *NEW MICROBIOLOGICA* vol. 36  
484 (2013).
- 485 23. Enany, S., Yaoita, E., Yoshida, Y., Enany, M. & Yamamoto, T. Molecular characterization  
486 of Panton-Valentine leukocidin-positive community-acquired methicillin-resistant  
487 *Staphylococcus aureus* isolates in Egypt. *Microbiological Research* **165**, 152–162 (2010).
- 488 24. Abouelfetouh, A. The Status of Methicillin Resistance Among Egyptian *Staphylococcus*  
489 *aureus* Isolates: An Overview. *Infectious disorders drug targets* **17**, 67–69 (2017).

- 490 25. Deurenberg, R. H. *et al.* The molecular evolution of methicillin-resistant *Staphylococcus*  
491 *aureus*. *Clin Microbiol Infect* **13**, 222–235 (2007).
- 492 26. Guo, Y., Song, G., Sun, M., Wang, J. & Wang, Y. Prevalence and Therapies of Antibiotic-  
493 Resistance in *Staphylococcus aureus*. *Frontiers in Cellular and Infection Microbiology* **10**,  
494 (2020).
- 495 27. Köck, R. *et al.* Methicillin-resistant *Staphylococcus aureus* (MRSA): burden of disease and  
496 control challenges in Europe. *Euro Surveill* **15**, 19688 (2010).
- 497 28. Chongtrakool, P. *et al.* Staphylococcal cassette chromosome mec (SCCmec) typing of  
498 methicillin-resistant *Staphylococcus aureus* strains isolated in 11 Asian countries: a proposal  
499 for a new nomenclature for SCCmec elements. *Antimicrob Agents Chemother* **50**, 1001–  
500 1012 (2006).
- 501 29. Nickerson, E. K., West, T. E., Day, N. P. & Peacock, S. J. *Staphylococcus aureus* disease  
502 and drug resistance in resource-limited countries in south and east Asia. *Lancet Infect Dis* **9**,  
503 130–135 (2009).
- 504 30. Kallen, A. J. *et al.* Health care-associated invasive MRSA infections, 2005-2008. *JAMA* **304**,  
505 641–648 (2010).
- 506 31. Laupland, K. B. *et al.* The changing epidemiology of *Staphylococcus aureus* bloodstream  
507 infection: a multinational population-based surveillance study. *Clin Microbiol Infect* **19**,  
508 465–471 (2013).
- 509 32. Yezli, S., Shibl, A. M., Livermore, D. M. & Memish, Z. A. Antimicrobial resistance among  
510 Gram-positive pathogens in Saudi Arabia. *J Chemother* **24**, 125–136 (2012).

- 511 33. John, J., George, S., Nori, S. R. C. & Nelson-Sathi, S. Phylogenomic Analysis Reveals the  
512 Evolutionary Route of Resistant Genes in *Staphylococcus aureus*. *Genome Biol Evol* **11**,  
513 2917–2926 (2019).
- 514 34. Nguyen, M., Olson, R., Shukla, M., VanOeffelen, M. & Davis, J. J. Predicting antimicrobial  
515 resistance using conserved genes. *PLoS Comput Biol* **16**, e1008319 (2020).
- 516 35. Biswas, R. *et al.* Activity of the major staphylococcal autolysin Atl. *FEMS Microbiol Lett*  
517 **259**, 260–268 (2006).
- 518 36. O’Gara, J. P. *ica* and beyond: biofilm mechanisms and regulation in *Staphylococcus*  
519 *epidermidis* and *Staphylococcus aureus*. *FEMS Microbiol Lett* **270**, 179–188 (2007).
- 520 37. Jefferson, K. K., Pier, D. B., Goldmann, D. A. & Pier, G. B. The teicoplanin-associated locus  
521 regulator (TcaR) and the intercellular adhesin locus regulator (IcaR) are transcriptional  
522 inhibitors of the *ica* locus in *Staphylococcus aureus*. *J Bacteriol* **186**, 2449–2456 (2004).
- 523 38. Joo, H.-S. & Otto, M. Molecular basis of in vivo biofilm formation by bacterial pathogens.  
524 *Chem Biol* **19**, 1503–1513 (2012).
- 525 39. Khatoon, Z., McTiernan, C. D., Suuronen, E. J., Mah, T.-F. & Alarcon, E. I. Bacterial  
526 biofilm formation on implantable devices and approaches to its treatment and prevention.  
527 *Heliyon* **4**, e01067 (2018).
- 528 40. Pereira-Ribeiro, P. M. *et al.* Influence of antibiotics on biofilm formation by different clones  
529 of nosocomial *Staphylococcus haemolyticus*. *Future Microbiol* **14**, 789–799 (2019).
- 530 41. Donlan, R. M. Biofilms: microbial life on surfaces. *Emerg Infect Dis* **8**, 881–890 (2002).
- 531 42. Archer, N. K. *et al.* *Staphylococcus aureus* biofilms: properties, regulation, and roles in  
532 human disease. *Virulence* **2**, 445–459 (2011).

- 533 43. Morikawa, K. *et al.* Expression of a cryptic secondary sigma factor gene unveils natural  
534 competence for DNA transformation in *Staphylococcus aureus*. *PLoS Pathog* **8**, e1003003  
535 (2012).
- 536 44. Lindsay, J. A. Genomic variation and evolution of *Staphylococcus aureus*. *Int J Med*  
537 *Microbiol* **300**, 98–103 (2010).
- 538 45. Langhanki, L. *et al.* In vivo competition and horizontal gene transfer among distinct  
539 *Staphylococcus aureus* lineages as major drivers for adaptational changes during long-term  
540 persistence in humans. *BMC Microbiol* **18**, 152 (2018).
- 541 46. Soliman, M. S. *et al.* Genomic Characterization of Methicillin-Resistant *Staphylococcus*  
542 *aureus* (MRSA) by High-Throughput Sequencing in a Tertiary Care Hospital. *Genes (Basel)*  
543 **11**, (2020).
- 544 47. Abou Shady, H. M., Bakr, A. E. A., Hashad, M. E. & Alzohairy, M. A. *Staphylococcus*  
545 *aureus* nasal carriage among outpatients attending primary health care centers: a comparative  
546 study of two cities in Saudi Arabia and Egypt. *Braz J Infect Dis* **19**, 68–76 (2015).
- 547 48. Alkharsah, K. R. *et al.* Comparative and molecular analysis of MRSA isolates from infection  
548 sites and carrier colonization sites. *Ann Clin Microbiol Antimicrob* **17**, 7 (2018).
- 549 49. Hadyeh, E., Azmi, K., Seir, R. A., Abdellatief, I. & Abdeen, Z. Molecular Characterization  
550 of Methicillin Resistant *Staphylococcus aureus* in West Bank-Palestine. *Front Public Health*  
551 **7**, 130 (2019).
- 552 50. Monecke, S. *et al.* Molecular Typing of ST239-MRSA-III From Diverse Geographic  
553 Locations and the Evolution of the SCCmec III Element During Its Intercontinental Spread.  
554 *Front Microbiol* **9**, 1436 (2018).

- 555 51. Alsequey, M. *et al.* Association between fluoroquinolone resistance and MRSA genotype in  
556 Alexandria, Egypt. *Scientific Reports* (2021).
- 557 52. Bankevich, A. *et al.* SPAdes: a new genome assembly algorithm and its applications to  
558 single-cell sequencing. *J. Comput. Biol.* **19**, 455–477 (2012).
- 559 53. Davis, J. J. *et al.* The PATRIC Bioinformatics Resource Center: expanding data and analysis  
560 capabilities. *Nucleic Acids Res* **48**, D606–D612 (2020).
- 561 54. Tatusova, T. *et al.* NCBI prokaryotic genome annotation pipeline. *Nucleic Acids Res.* **44**,  
562 6614–6624 (2016).
- 563 55. Larsen, M. V. *et al.* Multilocus sequence typing of total-genome-sequenced bacteria. *J Clin*  
564 *Microbiol* **50**, 1355–1361 (2012).
- 565 56. Jolley, K. A., Bray, J. E. & Maiden, M. C. J. Open-access bacterial population genomics:  
566 BIGSdb software, the PubMLST.org website and their applications. *Wellcome Open Res* **3**,  
567 124 (2018).
- 568 57. Bartels, M. D. *et al.* Comparing whole-genome sequencing with Sanger sequencing for spa  
569 typing of methicillin-resistant *Staphylococcus aureus*. *J Clin Microbiol* **52**, 4305–4308  
570 (2014).
- 571 58. Kondo, Y. *et al.* Combination of multiplex PCRs for staphylococcal cassette chromosome  
572 mec type assignment: rapid identification system for mec, ccr, and major differences in  
573 junkyard regions. *Antimicrob Agents Chemother* **51**, 264–274 (2007).
- 574 59. International Working Group on the Classification of Staphylococcal Cassette Chromosome  
575 Elements (IWG-SCC). Classification of staphylococcal cassette chromosome mec  
576 (SCCmec): guidelines for reporting novel SCCmec elements. *Antimicrob Agents Chemother*  
577 **53**, 4961–4967 (2009).

- 578 60. Wattam, A. R. *et al.* Improvements to PATRIC, the all-bacterial Bioinformatics Database  
579 and Analysis Resource Center. *Nucleic Acids Res.* **45**, D535–D542 (2017).
- 580 61. Liu, B., Zheng, D., Jin, Q., Chen, L. & Yang, J. VFDB 2019: a comparative pathogenomic  
581 platform with an interactive web interface. *Nucleic Acids Res.* **47**, D687–D692 (2019).
- 582 62. Eren, A. M. *et al.* Anvi'o: an advanced analysis and visualization platform for 'omics data.  
583 *PeerJ* **3**, e1319 (2015).
- 584 63. Delmont, T. O. & Eren, A. M. Linking pangenomes and metagenomes: the Prochlorococcus  
585 metapangenome. *PeerJ* **6**, e4320 (2018).
- 586 64. Galperin, M. Y., Makarova, K. S., Wolf, Y. I. & Koonin, E. V. Expanded microbial genome  
587 coverage and improved protein family annotation in the COG database. *Nucleic Acids Res.*  
588 **43**, D261-269 (2015).
- 589 65. Katoh, K. & Standley, D. M. MAFFT multiple sequence alignment software version 7:  
590 improvements in performance and usability. *Mol. Biol. Evol.* **30**, 772–780 (2013).
- 591 66. Price, M. N., Dehal, P. S. & Arkin, A. P. FastTree 2 – Approximately Maximum-Likelihood  
592 Trees for Large Alignments. *PLoS ONE* **5**, e9490 (2010).
- 593 67. Letunic, I. & Bork, P. Interactive Tree Of Life (iTOL) v4: recent updates and new  
594 developments. *Nucleic Acids Research* **47**, W256–W259 (2019).
- 595

**a**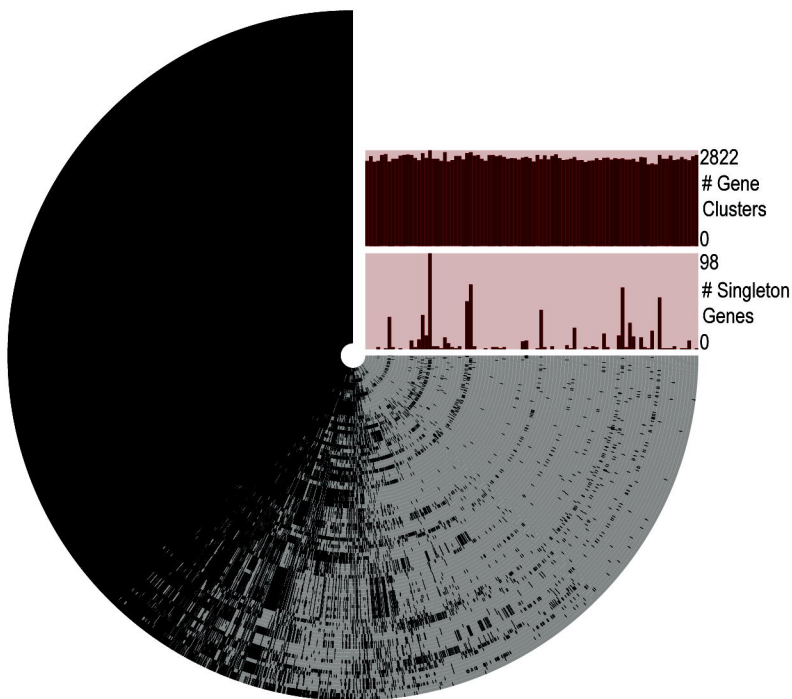**b**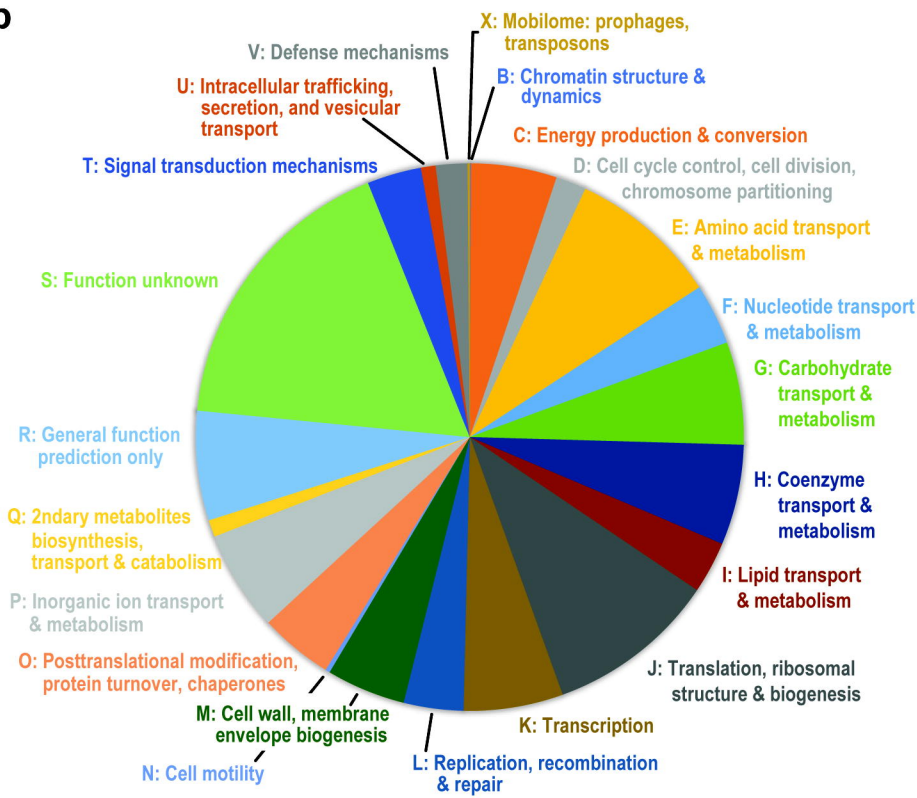

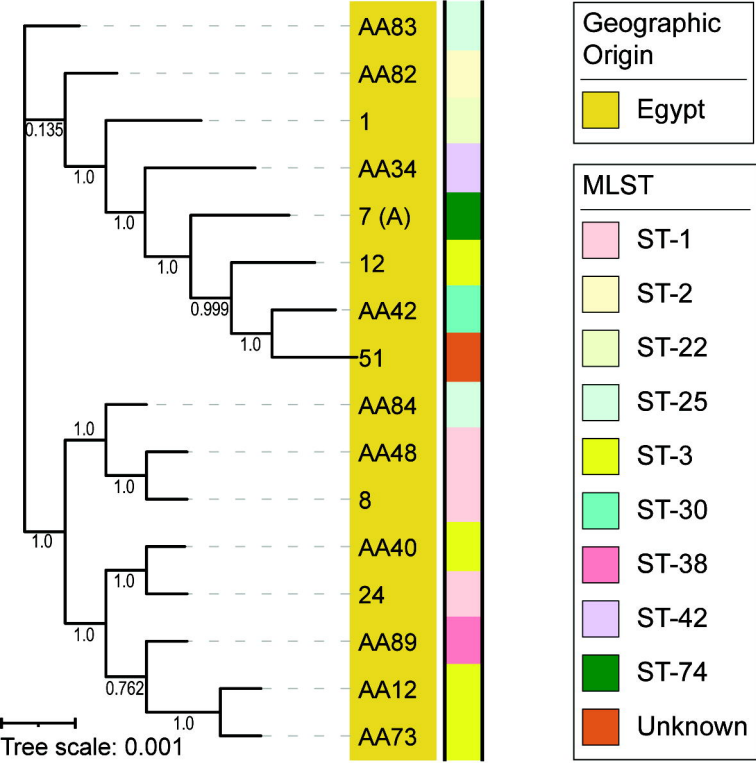



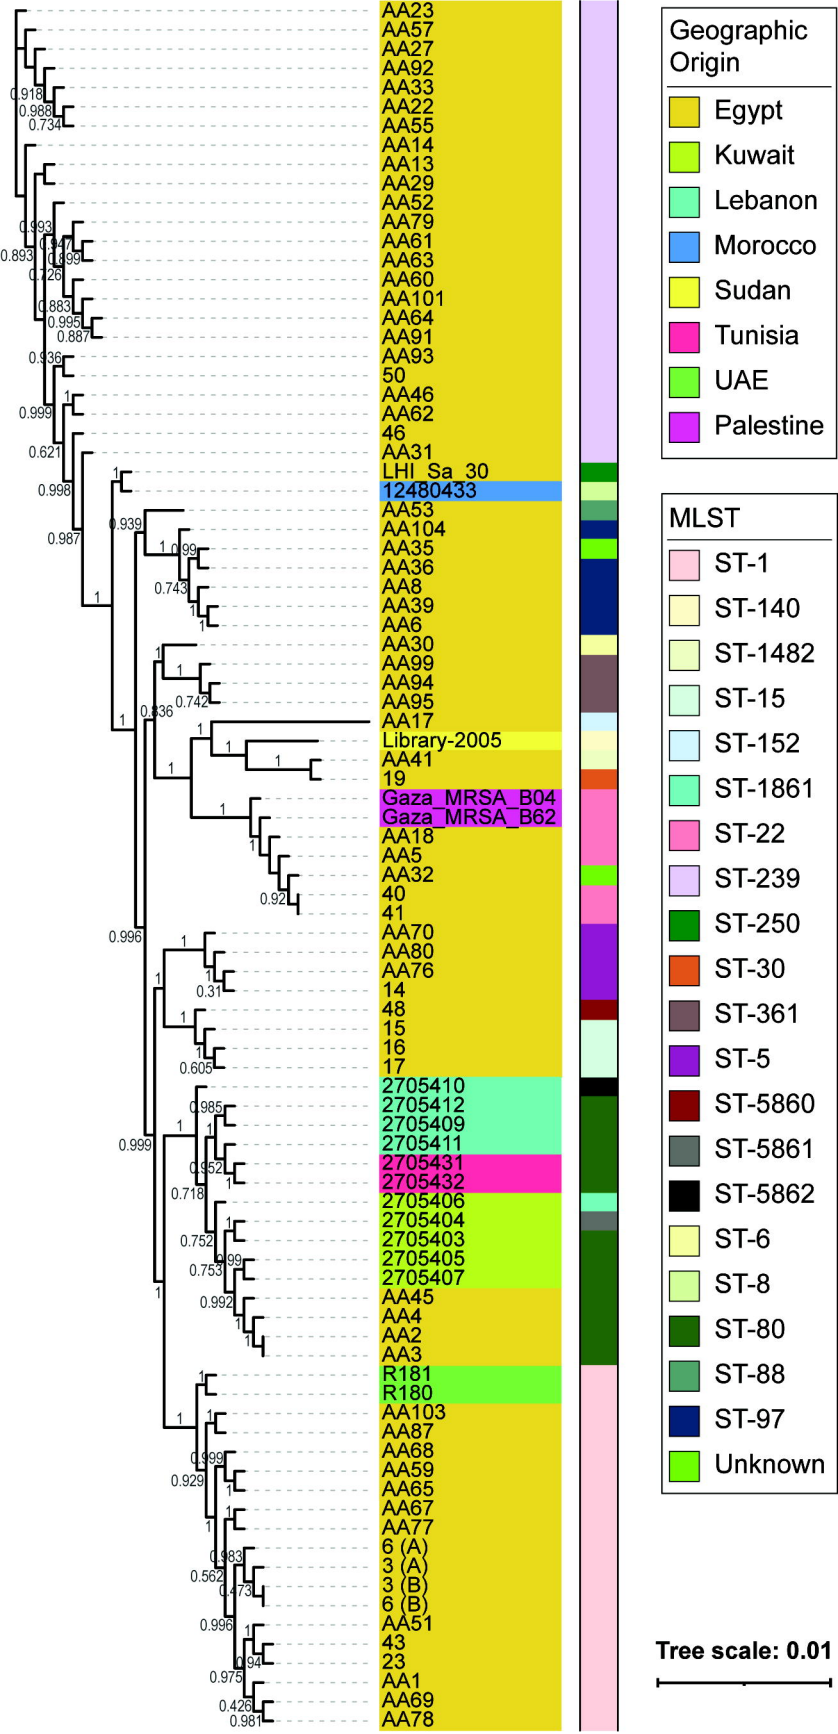

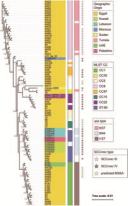

Source: https://www.biorxiv.org/content/10.1101/2021.05.01.442118v1.full.pdf
